# Supplementary material for: Co-occurring symptoms of attention deficit hyperactivity disorder (ADHD) in a population-based sample of adolescents screened for depression
Source: Springer Nature journal article supplement (doi:10.1186/s12888-016-0739-3), 2016-02-25
Supplement: MOESM1 [file 9748398]

## Supplementary Tables

**Table S-1- The items of the sMFQ**

---

|                |                                                   |
|----------------|---------------------------------------------------|
| <b>Item 1</b>  | I felt miserable or unhappy                       |
| <b>Item 2</b>  | I didn't enjoy anything                           |
| <b>Item 3</b>  | I felt so tired I just sat around and did nothing |
| <b>Item 4</b>  | I was restless                                    |
| <b>Item 5</b>  | I felt I was no good any more                     |
| <b>Item 6</b>  | I cried a lot                                     |
| <b>Item 7</b>  | I found it hard to think properly or concentrate  |
| <b>Item 8</b>  | I hated myself                                    |
| <b>Item 9</b>  | I was a bad person                                |
| <b>Item 10</b> | I felt lonely                                     |
| <b>Item 11</b> | I thought nobody really loved me                  |
| <b>Item 12</b> | I thought I could never be as good as other kids  |
| <b>Item 13</b> | I did everything wrong                            |

---

**Table S-2: Items included in the ASRS**

---

|                |                                                                                                       |
|----------------|-------------------------------------------------------------------------------------------------------|
| <b>Item 1</b>  | Trouble wrapping up the final details of a project, once the challenging parts have been done?        |
| <b>Item 2</b>  | Difficulty getting things in order when you have to do a task that requires organization?             |
| <b>Item 3</b>  | Problems remembering appointments or obligations?                                                     |
| <b>Item 4</b>  | When you have a task that requires a lot of thought, how often do you avoid or delay getting started? |
| <b>Item 5</b>  | Fidget or squirm with your hands or feet when you have to sit down for a long time?                   |
| <b>Item 6</b>  | Feel overly active and compelled to do things, like you were driven by a motor?                       |
| <b>Item 7</b>  | Make careless mistakes when you have to work on a boring or difficult project?                        |
| <b>Item 8</b>  | Difficulty keeping your attention when you are doing boring or repetitive work?                       |
| <b>Item 9</b>  | Difficulty concentrating on what people say to you, even when they are speaking to you directly?      |
| <b>Item 10</b> | Misplace or have difficulty finding things at home or at work?                                        |
| <b>Item 11</b> | Distracted by activity or noise around you?                                                           |
| <b>Item 12</b> | Leave your seat in meetings or other situations in which you are expected to remain seated?           |
| <b>Item 13</b> | Feel restless or fidgety?                                                                             |
| <b>Item 14</b> | Difficulty unwinding and relaxing when you have time to yourself?                                     |
| <b>Item 15</b> | Find yourself talking too much when you are in social situations?                                     |
| <b>Item 16</b> | When in a conversation, find yourself finishing the sentences before they can finish them themselves? |
| <b>Item 17</b> | Difficulty waiting your turn in situations when turn taking is required?                              |
| <b>Item 18</b> | Interrupt others when they are busy?                                                                  |

---
